# Supplementary material for: Reverse Polarization in Amino acid and Nucleotide Substitution Patterns Between Human–Mouse Orthologs of Two Compositional Extrema
Source: PubMed Central journal article supplement — DNA Res. 2007 Sep 25;14(4):141–54. doi: 10.1093/dnares/dsm015 (PMC2533592; doi:10.1093/dnares/dsm015), 2007-09-25
Supplement: dsm015_2.pdf [file dsm015_2.pdf]

**Supplementary Figure 1:** Total percentage occurrence of Gly, Ala, Arg and Pro (encoded by G/C-rich codons) and that of Phe, Tyr, Met, Ile, Asn and Lys (encoded by A/U-rich codons) in high GC, medium GC and low GC groups of human (violet bars) and mouse (pink bars) orthologous proteins.

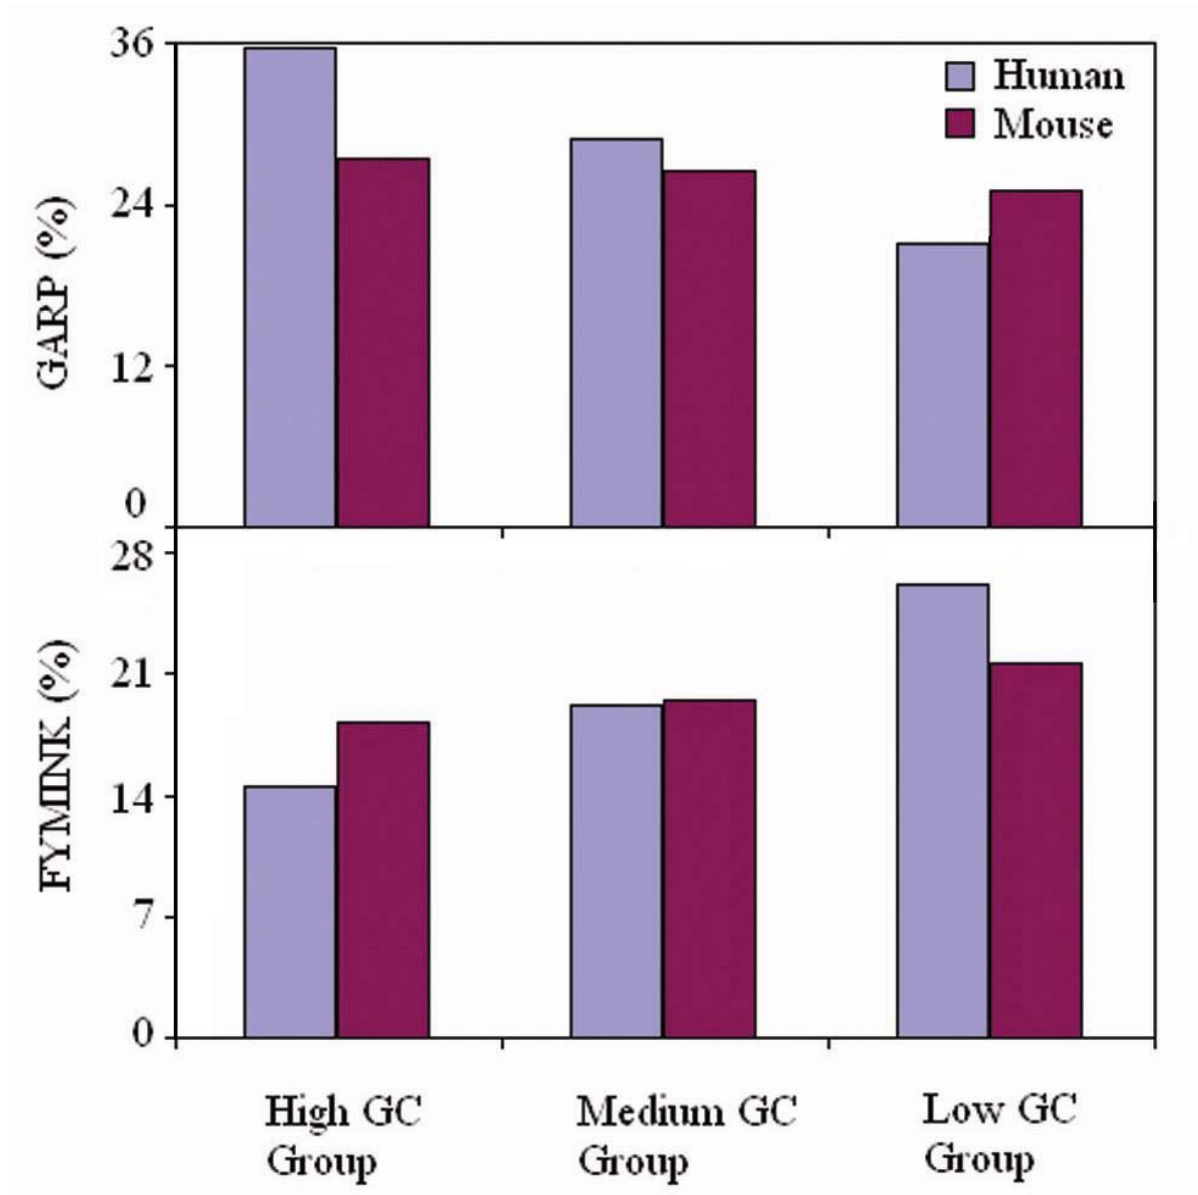

**Supplementary Figure 2:** Scatter plot of GC content of silent substitution positions of human and their corresponding mouse orthologous genes for high GC (blue), medium GC (green) and low GC (pink) groups. Human and mouse orthologous sequences, both having greater than 50 synonymous codons and gap free alignment regions with greater than 100 residues were considered here. For each orthologous pair, GC-content was calculated only for the silent substitution sites, i.e., the sites where synonymous substitutions had occurred between identical residues of the mouse and human orthologs.

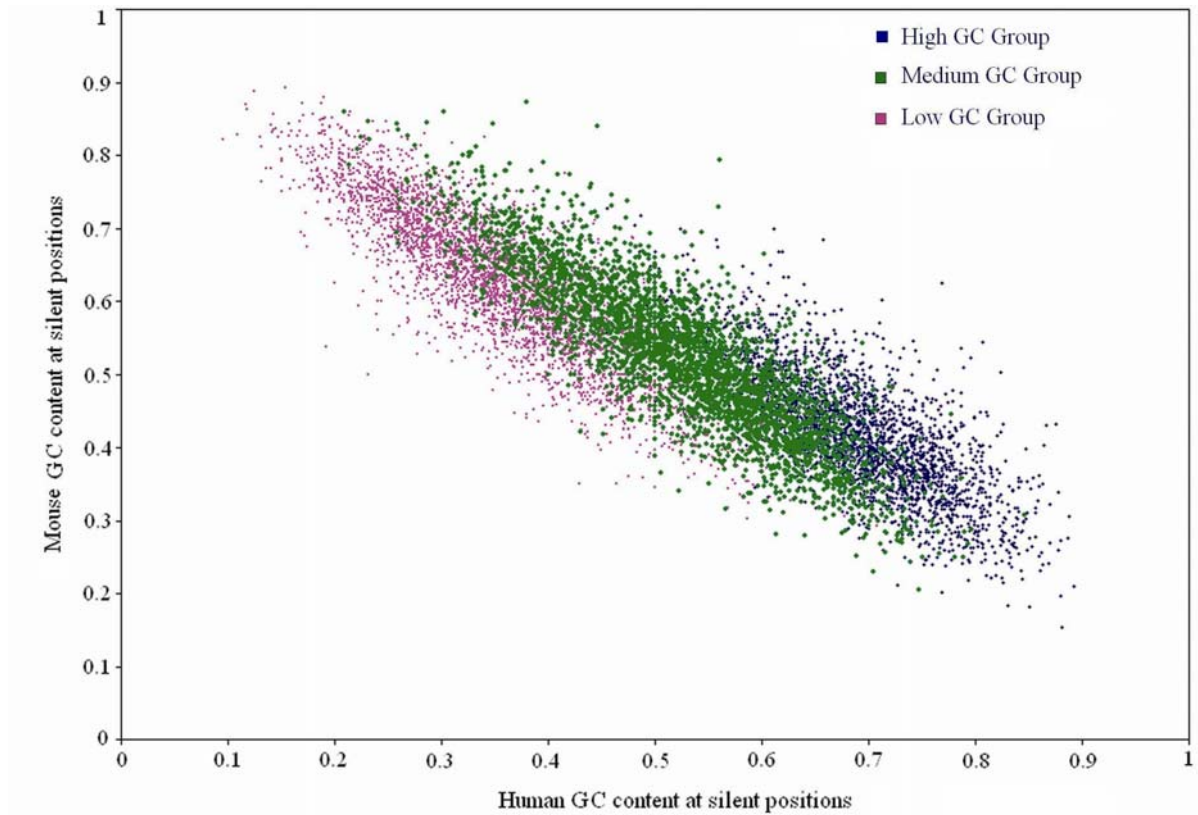

**Supplementary Table 1a:** Number of replacements between each residue pairs of mouse-human orthologs for high GC group

|       |     | Human  |        |       |       |       |       |       |       |       |       |        |       |       |       |       |        |        |       |       |       |
|-------|-----|--------|--------|-------|-------|-------|-------|-------|-------|-------|-------|--------|-------|-------|-------|-------|--------|--------|-------|-------|-------|
|       |     | Gly    | Ala    | Arg   | Pro   | Phe   | Tyr   | Met   | Ile   | Asn   | Lys   | Ser    | Thr   | Cys   | Trp   | Val   | Leu    | Glu    | Asp   | His   | Gln   |
| Mouse | Gly | 108023 | 1803   | 1031  | 140   | 16    | 11    | 56    | 39    | 268   | 121   | 2516   | 231   | 216   | 85    | 481   | 94     | 898    | 847   | 94    | 173   |
|       | Ala | 1944   | 114592 | 206   | 1852  | 66    | 12    | 241   | 266   | 118   | 103   | 2447   | 4020  | 56    | 17    | 3144  | 385    | 718    | 449   | 69    | 132   |
|       | Arg | 1222   | 241    | 94532 | 484   | 24    | 60    | 87    | 41    | 127   | 2518  | 806    | 262   | 371   | 317   | 99    | 541    | 244    | 79    | 1343  | 2448  |
|       | Pro | 137    | 1779   | 556   | 97186 | 48    | 23    | 45    | 41    | 42    | 63    | 2097   | 806   | 36    | 20    | 168   | 1634   | 94     | 50    | 330   | 804   |
|       | Phe | 26     | 95     | 53    | 108   | 61030 | 791   | 24    | 188   | 14    | 2     | 356    | 46    | 158   | 24    | 249   | 1757   | 8      | 7     | 80    | 18    |
|       | Tyr | 31     | 30     | 127   | 48    | 700   | 44400 | 6     | 17    | 80    | 12    | 188    | 26    | 318   | 16    | 14    | 77     | 22     | 69    | 917   | 74    |
|       | Met | 67     | 386    | 115   | 68    | 33    | 6     | 29276 | 611   | 13    | 130   | 77     | 764   | 5     | 11    | 1601  | 1753   | 86     | 15    | 6     | 55    |
|       | Ile | 98     | 565    | 57    | 83    | 229   | 20    | 757   | 56297 | 73    | 32    | 265    | 1045  | 12    | 1     | 4572  | 1500   | 28     | 15    | 20    | 18    |
|       | Asn | 572    | 240    | 225   | 52    | 14    | 71    | 16    | 53    | 45150 | 457   | 2878   | 569   | 44    | 3     | 46    | 33     | 211    | 1367  | 553   | 133   |
|       | Lys | 260    | 186    | 3412  | 78    | 3     | 7     | 131   | 30    | 407   | 70500 | 237    | 413   | 4     | 33    | 88    | 70     | 1257   | 137   | 103   | 1244  |
|       | Ser | 3749   | 4160   | 953   | 3603  | 334   | 143   | 87    | 187   | 2145  | 171   | 107933 | 2926  | 552   | 79    | 346   | 734    | 208    | 403   | 282   | 219   |
|       | Thr | 422    | 6873   | 262   | 1227  | 69    | 17    | 851   | 749   | 514   | 415   | 2831   | 70689 | 44    | 8     | 949   | 342    | 213    | 157   | 69    | 110   |
|       | Cys | 284    | 84     | 454   | 61    | 130   | 254   | 8     | 12    | 25    | 5     | 593    | 38    | 38249 | 96    | 48    | 86     | 6      | 21    | 145   | 40    |
|       | Trp | 99     | 17     | 366   | 27    | 16    | 12    | 11    | 3     | 0     | 9     | 72     | 9     | 82    | 22224 | 20    | 135    | 15     | 2     | 10    | 115   |
|       | Val | 672    | 4484   | 93    | 268   | 208   | 20    | 1318  | 3756  | 37    | 50    | 346    | 878   | 46    | 19    | 94462 | 2515   | 297    | 112   | 27    | 73    |
|       | Leu | 123    | 492    | 707   | 2060  | 1387  | 71    | 1211  | 1012  | 30    | 54    | 728    | 322   | 88    | 144   | 2321  | 172576 | 92     | 28    | 300   | 712   |
|       | Glu | 1170   | 1014   | 284   | 94    | 7     | 12    | 47    | 19    | 149   | 785   | 153    | 155   | 8     | 15    | 365   | 61     | 101420 | 3237  | 67    | 1267  |
|       | Asp | 1167   | 703    | 84    | 61    | 9     | 41    | 14    | 23    | 1088  | 112   | 381    | 144   | 18    | 6     | 130   | 27     | 3799   | 71227 | 219   | 125   |
|       | His | 136    | 67     | 1899  | 457   | 44    | 611   | 12    | 22    | 427   | 64    | 245    | 76    | 143   | 17    | 23    | 259    | 85     | 232   | 38676 | 1405  |
|       | Gln | 208    | 167    | 3389  | 975   | 17    | 46    | 44    | 11    | 90    | 845   | 167    | 111   | 63    | 151   | 68    | 807    | 1477   | 99    | 1382  | 68409 |

The value in each cell (i, j) indicates the number of times the amino acid residue for the ith row in mouse orthologous proteins replaced by the amino acid residue for the jth column in the human protein for high GC group.

**Supplementary Table 1b:** Number of replacements between each residue pairs of mouse-human orthologs for medium GC group

|       |     | Human  |        |       |       |       |       |       |       |       |       |        |       |       |       |       |        |        |       |       |       |
|-------|-----|--------|--------|-------|-------|-------|-------|-------|-------|-------|-------|--------|-------|-------|-------|-------|--------|--------|-------|-------|-------|
|       |     | Gly    | Ala    | Arg   | Pro   | Phe   | Tyr   | Met   | Ile   | Asn   | Lys   | Ser    | Thr   | Cys   | Trp   | Val   | Leu    | Glu    | Asp   | His   | Gln   |
| Mouse | Gly | 109247 | 1572   | 1062  | 122   | 26    | 28    | 59    | 72    | 394   | 235   | 2560   | 253   | 242   | 90    | 673   | 118    | 1337   | 1064  | 80    | 164   |
|       | Ala | 1715   | 107394 | 209   | 1688  | 112   | 30    | 281   | 455   | 196   | 177   | 2972   | 4753  | 66    | 10    | 3561  | 433    | 769    | 488   | 56    | 140   |
|       | Arg | 1178   | 176    | 89218 | 447   | 30    | 81    | 127   | 71    | 243   | 4017  | 934    | 376   | 395   | 322   | 104   | 479    | 356    | 78    | 1276  | 2372  |
|       | Pro | 112    | 1570   | 438   | 97714 | 98    | 33    | 68    | 80    | 55    | 92    | 3113   | 1114  | 48    | 28    | 195   | 1691   | 105    | 52    | 462   | 1033  |
|       | Phe | 28     | 94     | 33    | 129   | 64953 | 888   | 39    | 326   | 24    | 15    | 512    | 76    | 172   | 29    | 319   | 2079   | 18     | 14    | 99    | 23    |
|       | Tyr | 31     | 30     | 96    | 54    | 749   | 48308 | 10    | 21    | 130   | 16    | 230    | 37    | 380   | 25    | 27    | 97     | 18     | 96    | 982   | 83    |
|       | Met | 57     | 312    | 149   | 56    | 54    | 8     | 33868 | 1105  | 27    | 173   | 103    | 879   | 10    | 12    | 1642  | 1648   | 80     | 11    | 13    | 67    |
|       | Ile | 95     | 536    | 94    | 97    | 343   | 27    | 1016  | 70057 | 153   | 86    | 340    | 1406  | 23    | 2     | 4982  | 1676   | 48     | 42    | 25    | 27    |
|       | Asn | 467    | 203    | 233   | 70    | 17    | 147   | 28    | 135   | 55218 | 823   | 3213   | 770   | 42    | 4     | 59    | 47     | 269    | 1585  | 606   | 128   |
|       | Lys | 283    | 169    | 3701  | 89    | 9     | 17    | 201   | 84    | 825   | 90225 | 329    | 527   | 11    | 33    | 114   | 109    | 1514   | 176   | 110   | 1341  |
|       | Ser | 2782   | 3507   | 848   | 3804  | 523   | 244   | 134   | 330   | 3626  | 371   | 121625 | 3652  | 735   | 95    | 410   | 1041   | 230    | 502   | 320   | 247   |
|       | Thr | 348    | 5566   | 351   | 1150  | 82    | 33    | 1024  | 1486  | 875   | 631   | 3113   | 79120 | 44    | 8     | 1134  | 337    | 220    | 169   | 64    | 124   |
|       | Cys | 272    | 82     | 369   | 78    | 177   | 418   | 9     | 18    | 55    | 15    | 804    | 51    | 37847 | 90    | 42    | 129    | 13     | 22    | 174   | 45    |
|       | Trp | 100    | 17     | 262   | 16    | 21    | 19    | 16    | 8     | 3     | 17    | 86     | 14    | 97    | 21791 | 30    | 165    | 19     | 3     | 12    | 112   |
|       | Val | 610    | 3759   | 114   | 253   | 387   | 26    | 1671  | 5839  | 66    | 109   | 378    | 1066  | 50    | 23    | 97764 | 2663   | 365    | 139   | 28    | 87    |
|       | Leu | 98     | 451    | 519   | 1999  | 2062  | 115   | 1483  | 1820  | 51    | 81    | 991    | 420   | 109   | 185   | 2527  | 171268 | 109    | 46    | 343   | 781   |
|       | Glu | 1383   | 850    | 317   | 100   | 10    | 16    | 88    | 36    | 251   | 1336  | 201    | 210   | 13    | 25    | 401   | 111    | 112810 | 3833  | 85    | 1463  |
|       | Asp | 1209   | 661    | 80    | 67    | 15    | 112   | 17    | 48    | 1566  | 203   | 483    | 182   | 29    | 4     | 192   | 33     | 4443   | 79104 | 262   | 133   |
|       | His | 116    | 53     | 1350  | 415   | 61    | 880   | 14    | 30    | 618   | 135   | 304    | 80    | 187   | 22    | 31    | 313    | 124    | 323   | 40412 | 1611  |
|       | Gln | 205    | 116    | 2676  | 902   | 20    | 94    | 46    | 21    | 177   | 1292  | 203    | 108   | 45    | 135   | 85    | 828    | 1601   | 161   | 1522  | 75314 |

The value in each cell (i, j) indicates the number of times the amino acid residue for the ith row in mouse orthologous proteins replaced by the amino acid residue for the jth column in the human protein for medium GC group.

**Supplementary Table 1c:** Number of replacements between each residue pairs of mouse-human orthologs for low GC group

|       |     | Human  |        |       |        |       |       |       |       |       |        |        |       |       |       |        |        |        |        |       |       |
|-------|-----|--------|--------|-------|--------|-------|-------|-------|-------|-------|--------|--------|-------|-------|-------|--------|--------|--------|--------|-------|-------|
|       |     | Gly    | Ala    | Arg   | Pro    | Phe   | Tyr   | Met   | Ile   | Asn   | Lys    | Ser    | Thr   | Cys   | Trp   | Val    | Leu    | Glu    | Asp    | His   | Gln   |
| Mouse | Gly | 116738 | 1465   | 953   | 92     | 42    | 42    | 80    | 175   | 646   | 311    | 2411   | 313   | 293   | 61    | 894    | 126    | 1901   | 1462   | 100   | 155   |
|       | Ala | 1658   | 114211 | 162   | 1674   | 113   | 37    | 338   | 885   | 343   | 307    | 3975   | 6393  | 73    | 9     | 4193   | 499    | 1058   | 669    | 73    | 173   |
|       | Arg | 972    | 167    | 96369 | 303    | 37    | 116   | 211   | 178   | 395   | 6603   | 955    | 486   | 292   | 178   | 127    | 433    | 389    | 105    | 1230  | 1912  |
|       | Pro | 101    | 1354   | 311   | 103845 | 137   | 73    | 63    | 164   | 129   | 142    | 4178   | 1470  | 61    | 15    | 225    | 1742   | 123    | 66     | 563   | 1282  |
|       | Phe | 20     | 70     | 28    | 102    | 78174 | 1186  | 41    | 449   | 35    | 20     | 659    | 66    | 213   | 25    | 371    | 2330   | 13     | 10     | 88    | 23    |
|       | Tyr | 28     | 28     | 84    | 30     | 949   | 59346 | 8     | 37    | 211   | 26     | 305    | 35    | 571   | 33    | 31     | 128    | 34     | 127    | 1040  | 95    |
|       | Met | 50     | 248    | 146   | 45     | 60    | 11    | 42450 | 1900  | 58    | 272    | 129    | 1028  | 5     | 6     | 1624   | 1477   | 61     | 25     | 13    | 50    |
|       | Ile | 84     | 531    | 119   | 100    | 471   | 33    | 1288  | 95635 | 325   | 198    | 401    | 1733  | 18    | 8     | 6335   | 2035   | 62     | 63     | 46    | 26    |
|       | Asn | 366    | 174    | 209   | 49     | 29    | 245   | 47    | 278   | 78601 | 1524   | 3733   | 975   | 56    | 1     | 84     | 60     | 347    | 2030   | 715   | 163   |
|       | Lys | 254    | 156    | 4059  | 71     | 13    | 28    | 258   | 198   | 1467  | 132079 | 341    | 718   | 12    | 13    | 134    | 99     | 1907   | 234    | 105   | 1436  |
|       | Ser | 2102   | 3195   | 808   | 3304   | 869   | 452   | 155   | 613   | 6508  | 547    | 149355 | 4498  | 892   | 50    | 485    | 1561   | 283    | 705    | 370   | 222   |
|       | Thr | 286    | 5117   | 427   | 972    | 88    | 50    | 1166  | 2612  | 1630  | 1150   | 3563   | 96024 | 62    | 9     | 1190   | 391    | 282    | 204    | 84    | 138   |
|       | Cys | 222    | 75     | 262   | 79     | 356   | 774   | 10    | 36    | 103   | 16     | 1167   | 62    | 41061 | 103   | 32     | 122    | 8      | 52     | 224   | 64    |
|       | Trp | 63     | 3      | 184   | 14     | 37    | 24    | 16    | 9     | 7     | 20     | 76     | 5     | 103   | 23298 | 22     | 178    | 19     | 4      | 16    | 94    |
|       | Val | 496    | 3264   | 122   | 205    | 577   | 41    | 1995  | 9402  | 117   | 175    | 466    | 1309  | 61    | 18    | 111615 | 3023   | 384    | 226    | 37    | 75    |
|       | Leu | 81     | 363    | 353   | 1519   | 2990  | 140   | 1764  | 3003  | 88    | 141    | 1353   | 428   | 110   | 153   | 2685   | 193480 | 104    | 29     | 366   | 641   |
|       | Glu | 1478   | 807    | 277   | 85     | 17    | 34    | 102   | 95    | 387   | 2056   | 212    | 236   | 14    | 16    | 489    | 113    | 144658 | 5014   | 115   | 1679  |
|       | Asp | 1081   | 541    | 62    | 50     | 20    | 159   | 26    | 90    | 2520  | 262    | 506    | 189   | 36    | 5     | 254    | 50     | 5952   | 100062 | 329   | 144   |
|       | His | 81     | 45     | 872   | 362    | 96    | 1348  | 15    | 48    | 1258  | 184    | 373    | 92    | 239   | 17    | 32     | 325    | 108    | 421    | 46930 | 1931  |
|       | Gln | 144    | 119    | 1758  | 760    | 27    | 114   | 48    | 46    | 221   | 1970   | 202    | 131   | 49    | 85    | 77     | 695    | 1765   | 144    | 1765  | 90319 |

The value in each cell (i, j) indicates the number of times the amino acid residue for the ith row in mouse orthologous proteins replaced by the amino acid residue for the jth column in the human protein for low GC group.
